# Supplementary material
Source: Elsevier journal article supplement (https://rcastoragev2.blob.core.windows.net/8f70e8c338668b7f3a49ed55a46d8e61/mmc1.pdf)
Supplement: mmc1 [file mmc1.pdf]

**Developmental Cell, Volume 55**

## **Supplemental Information**

### **Single-Cell Sequencing of Developing**

### **Human Gut Reveals Transcriptional Links**

### **to Childhood Crohn's Disease**

**Rasa Elmentaite, Alexander D.B. Ross, Kenny Roberts, Kylie R. James, Daniel Ortmann, Tomás Gomes, Komal Nayak, Liz Tuck, Sophie Pritchard, Omer Ali Bayraktar, Robert Heuschkel, Ludovic Vallier, Sarah A. Teichmann, and Matthias Zilbauer**

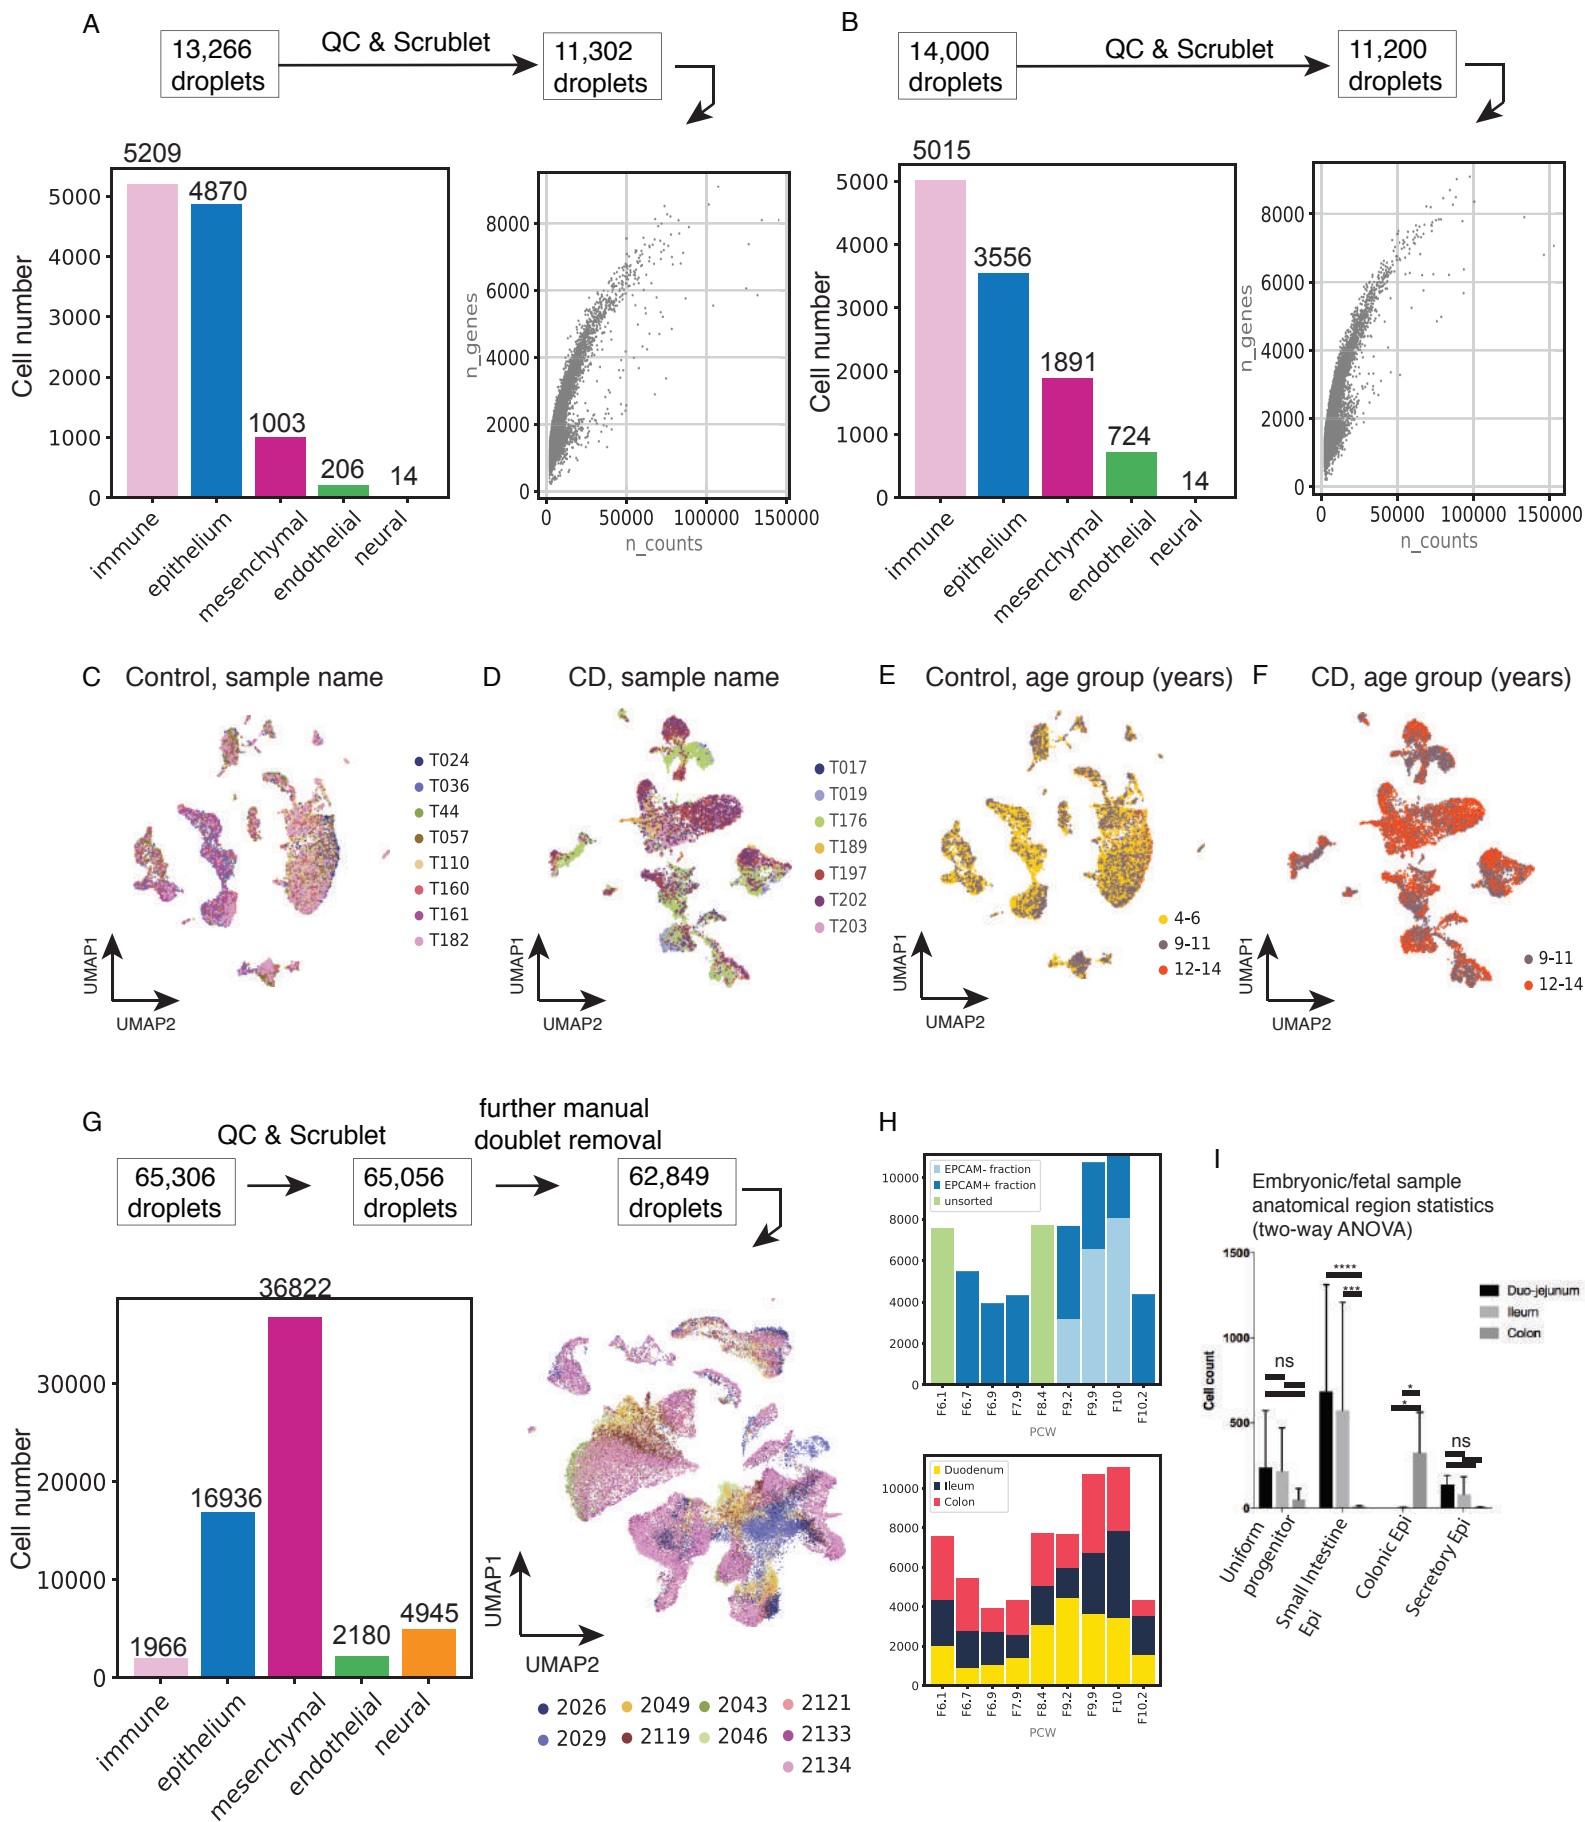

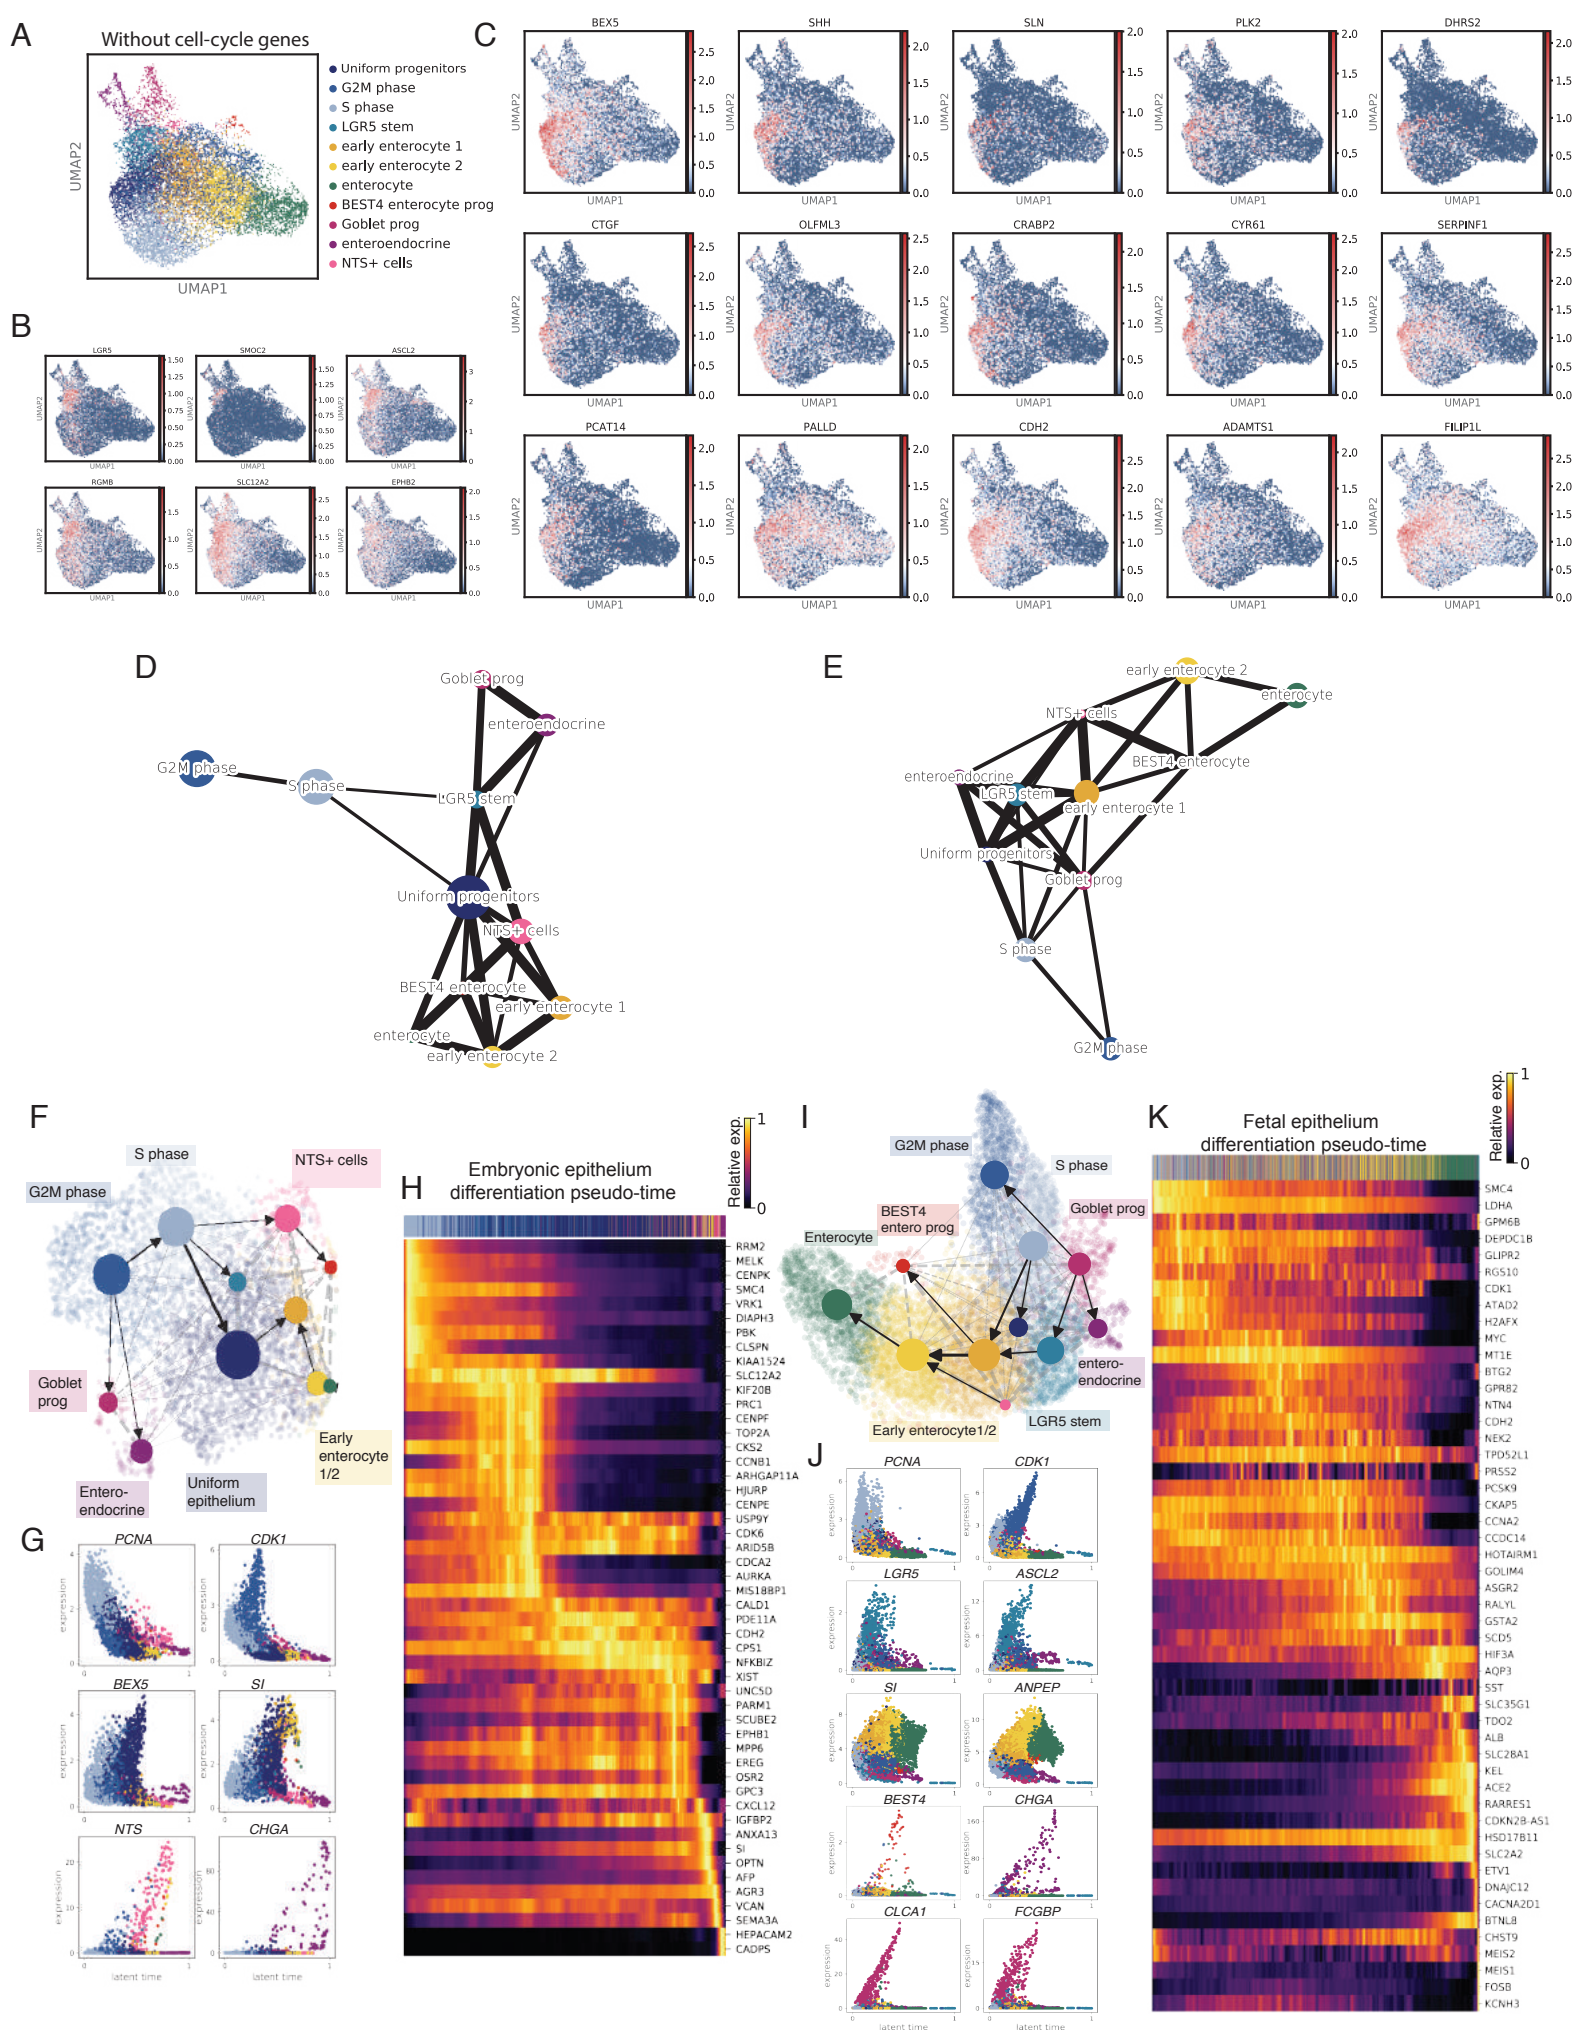



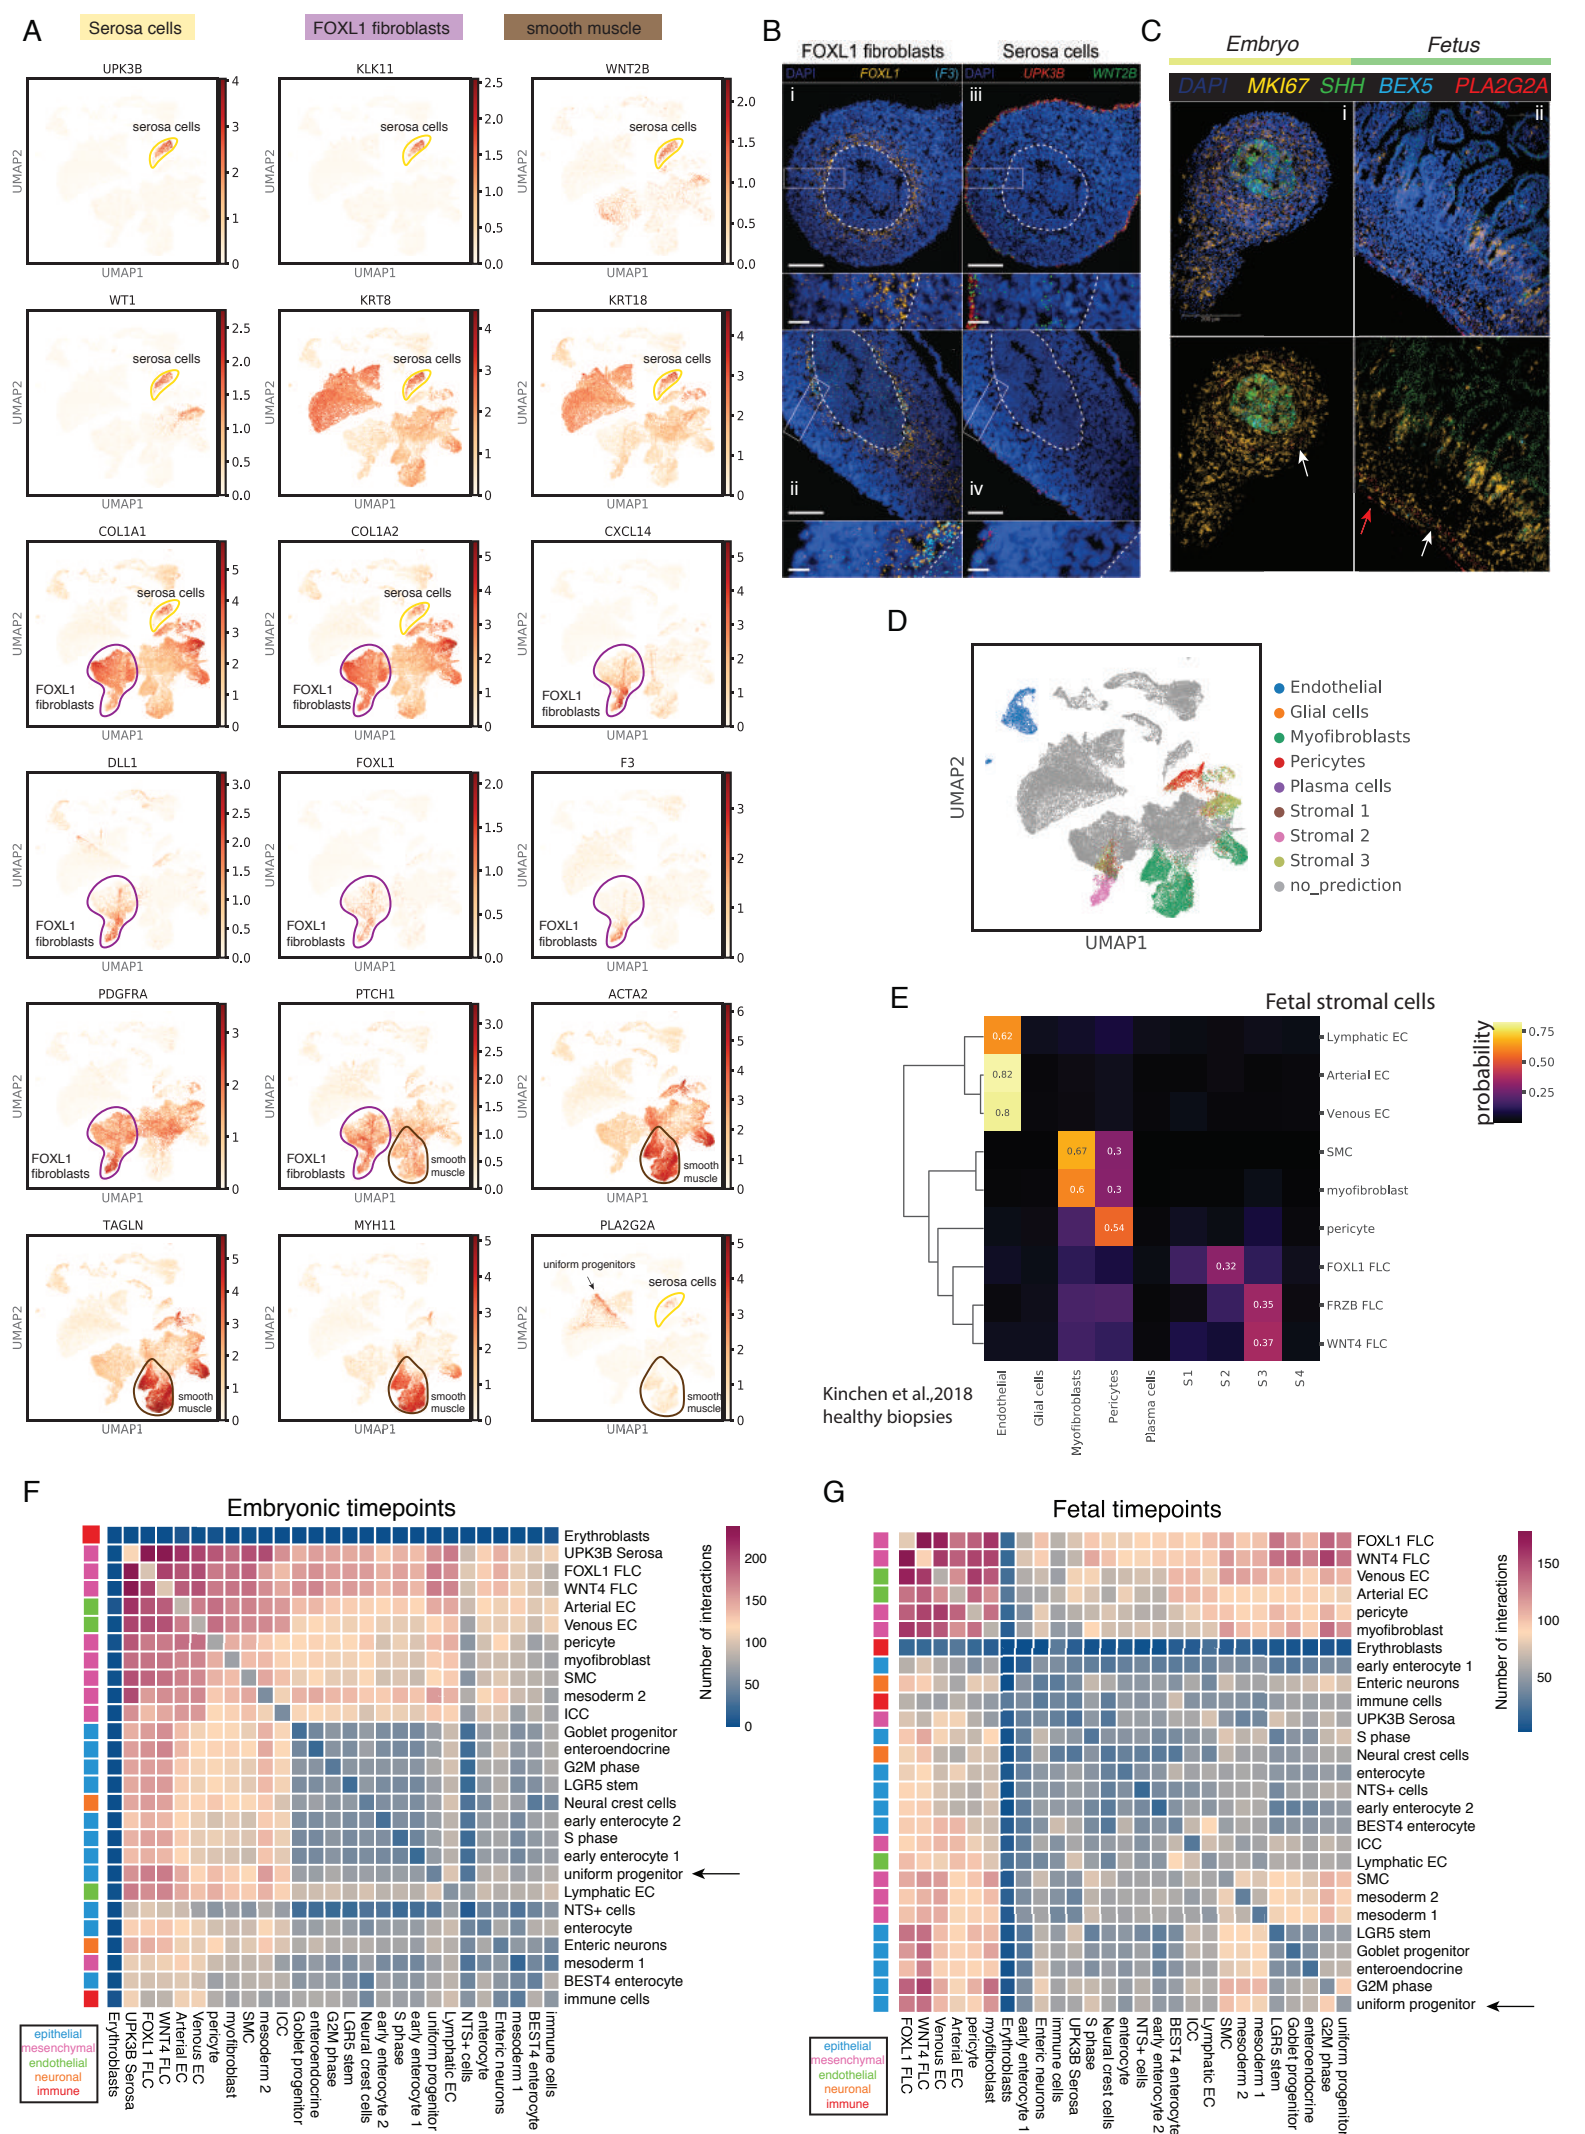



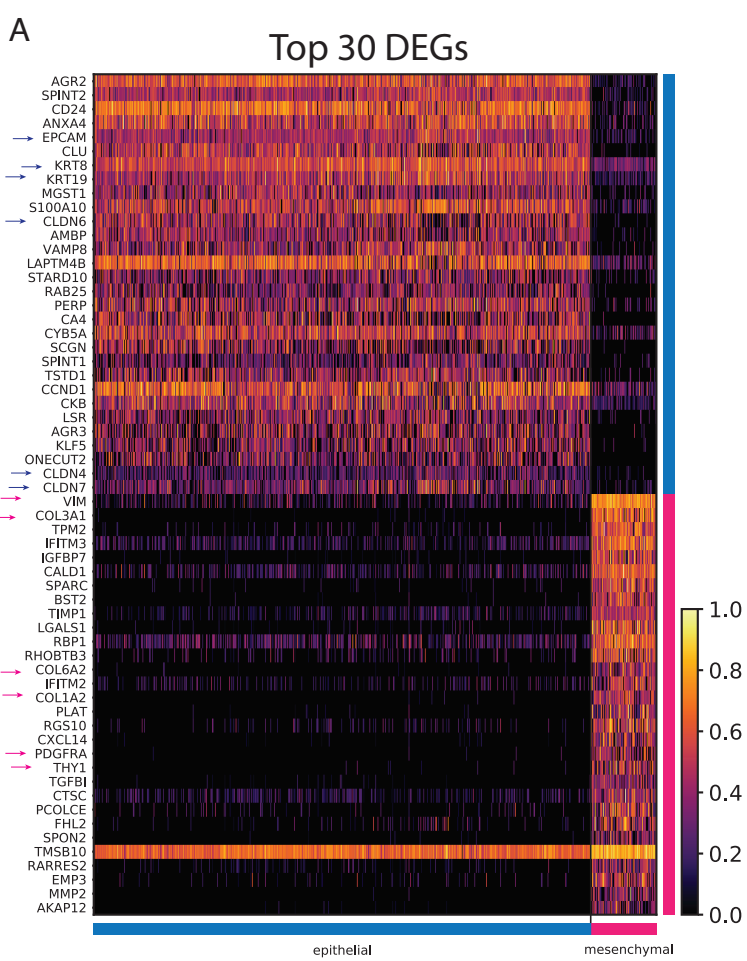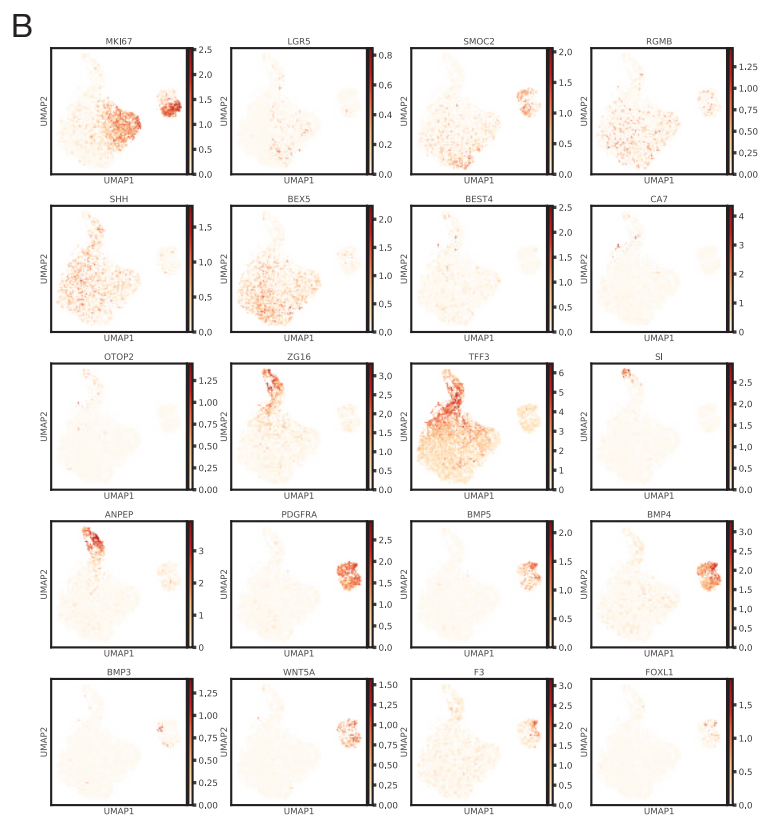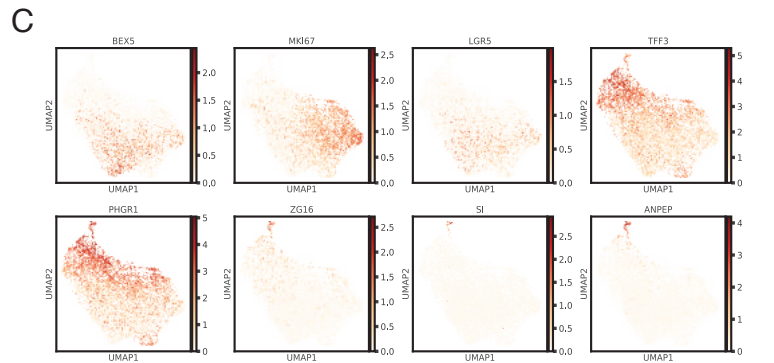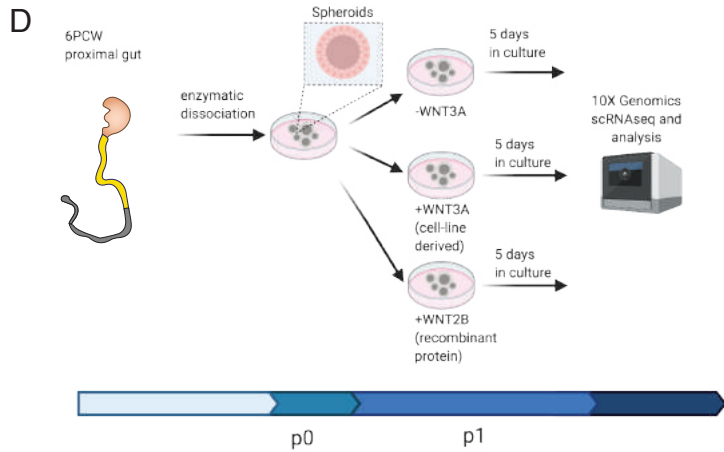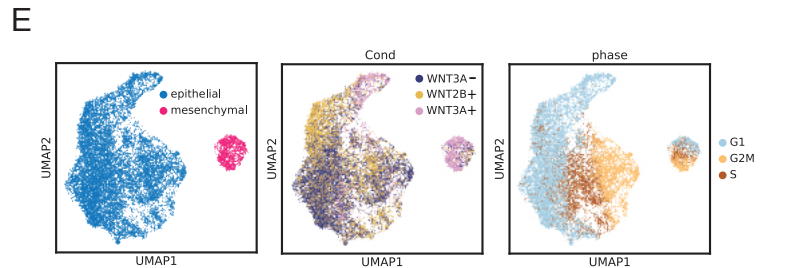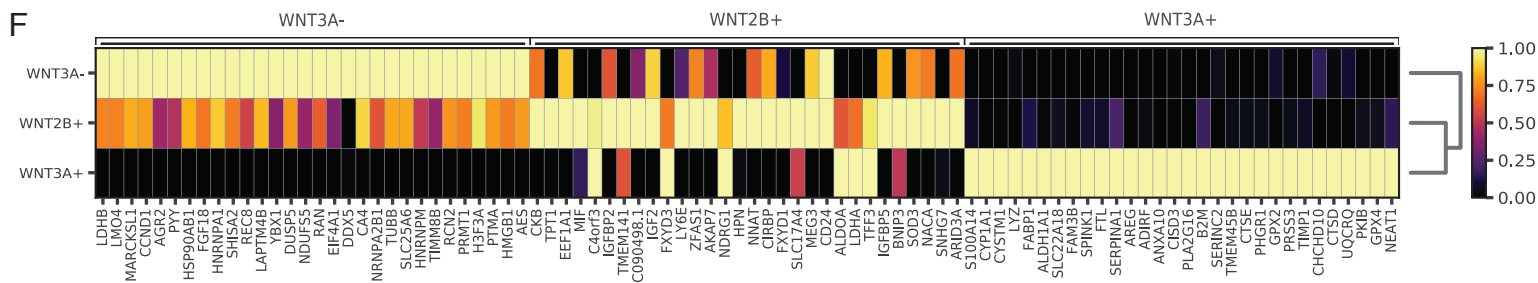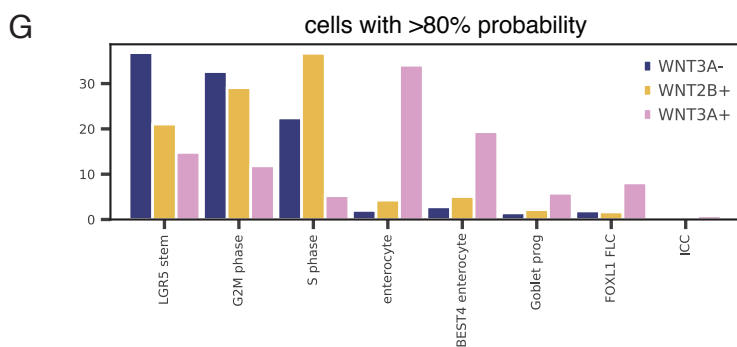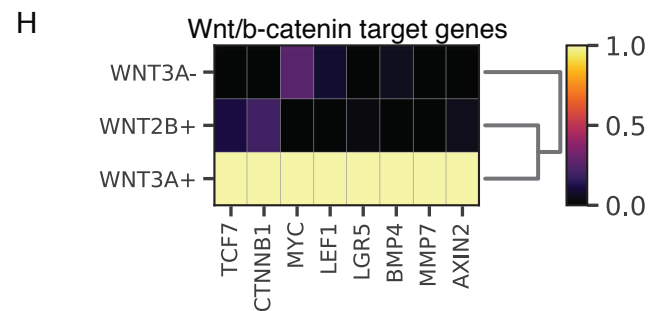

A

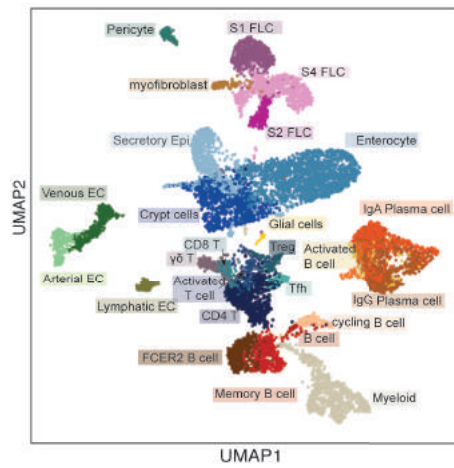

B

Marker genes

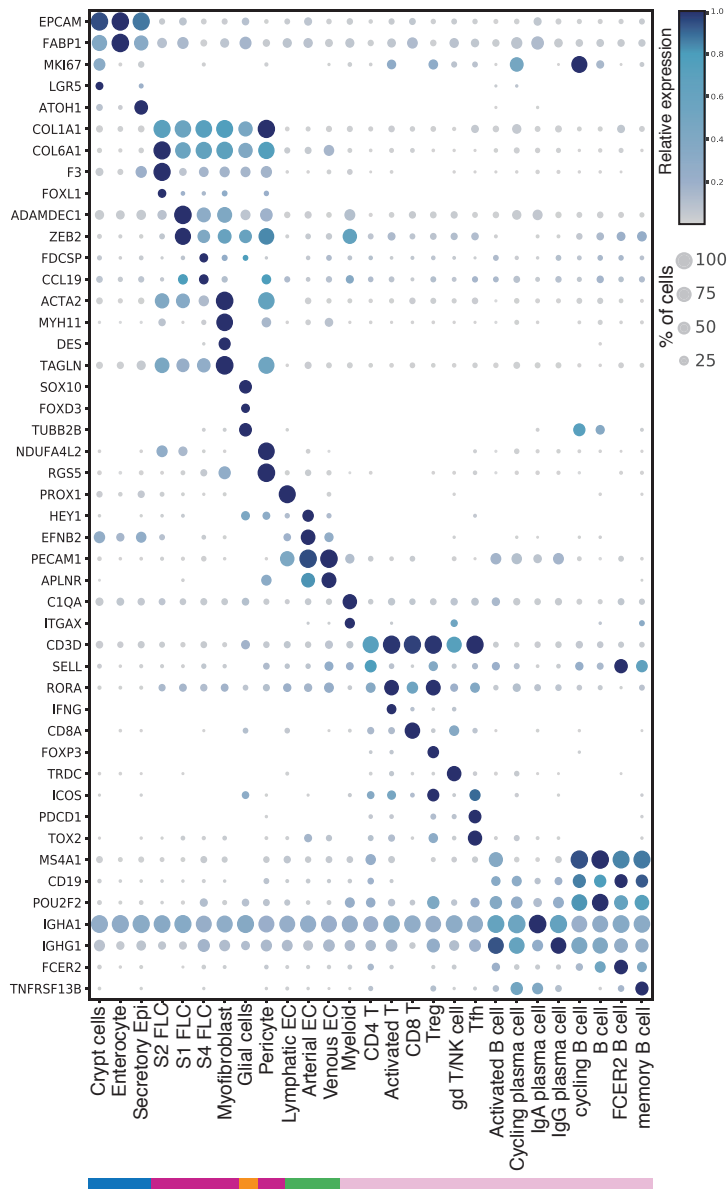

C

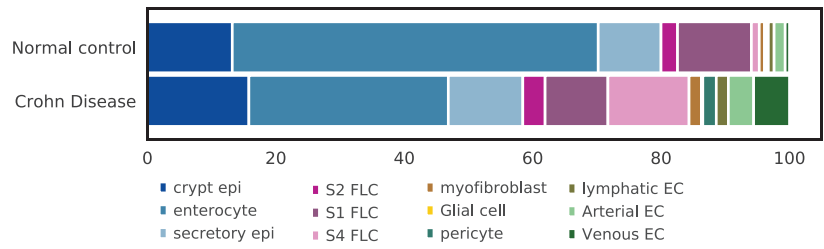

D

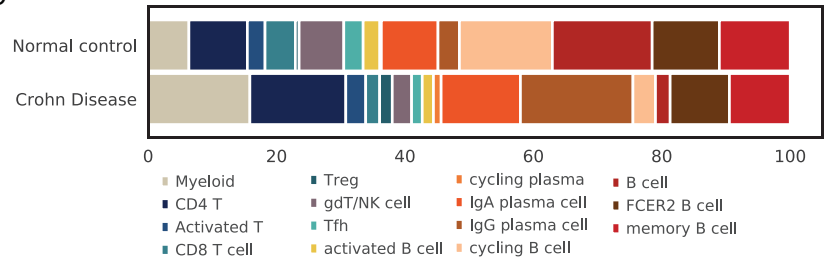

E

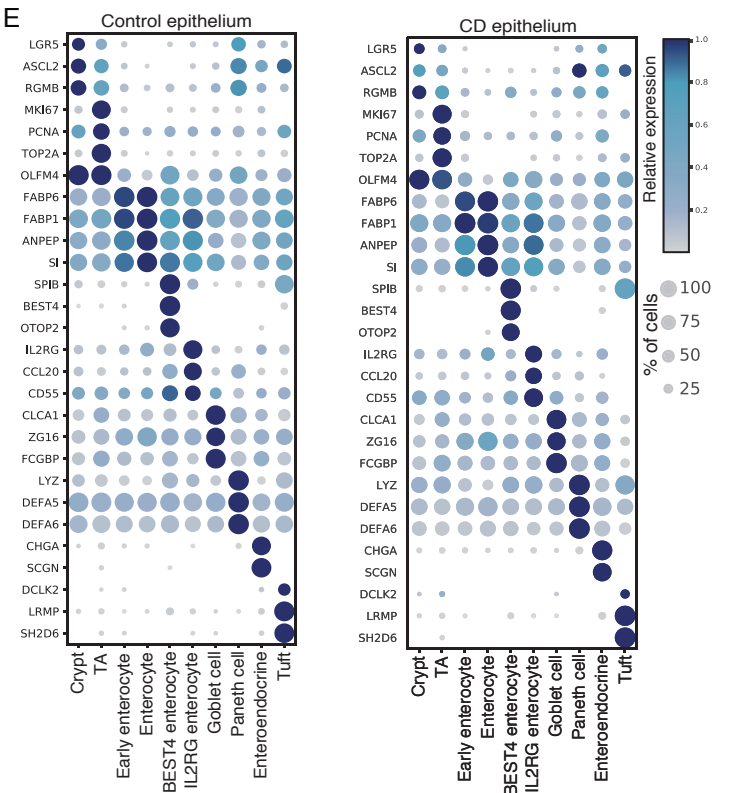

F

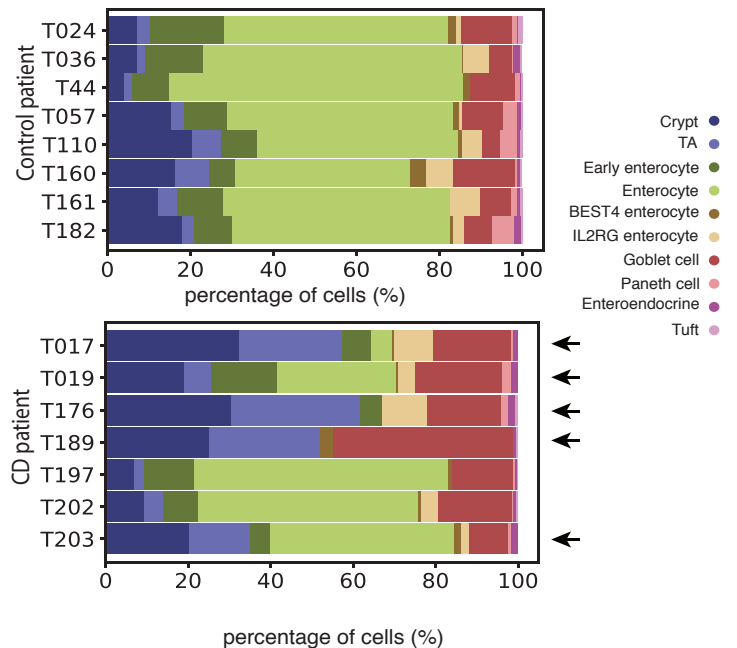

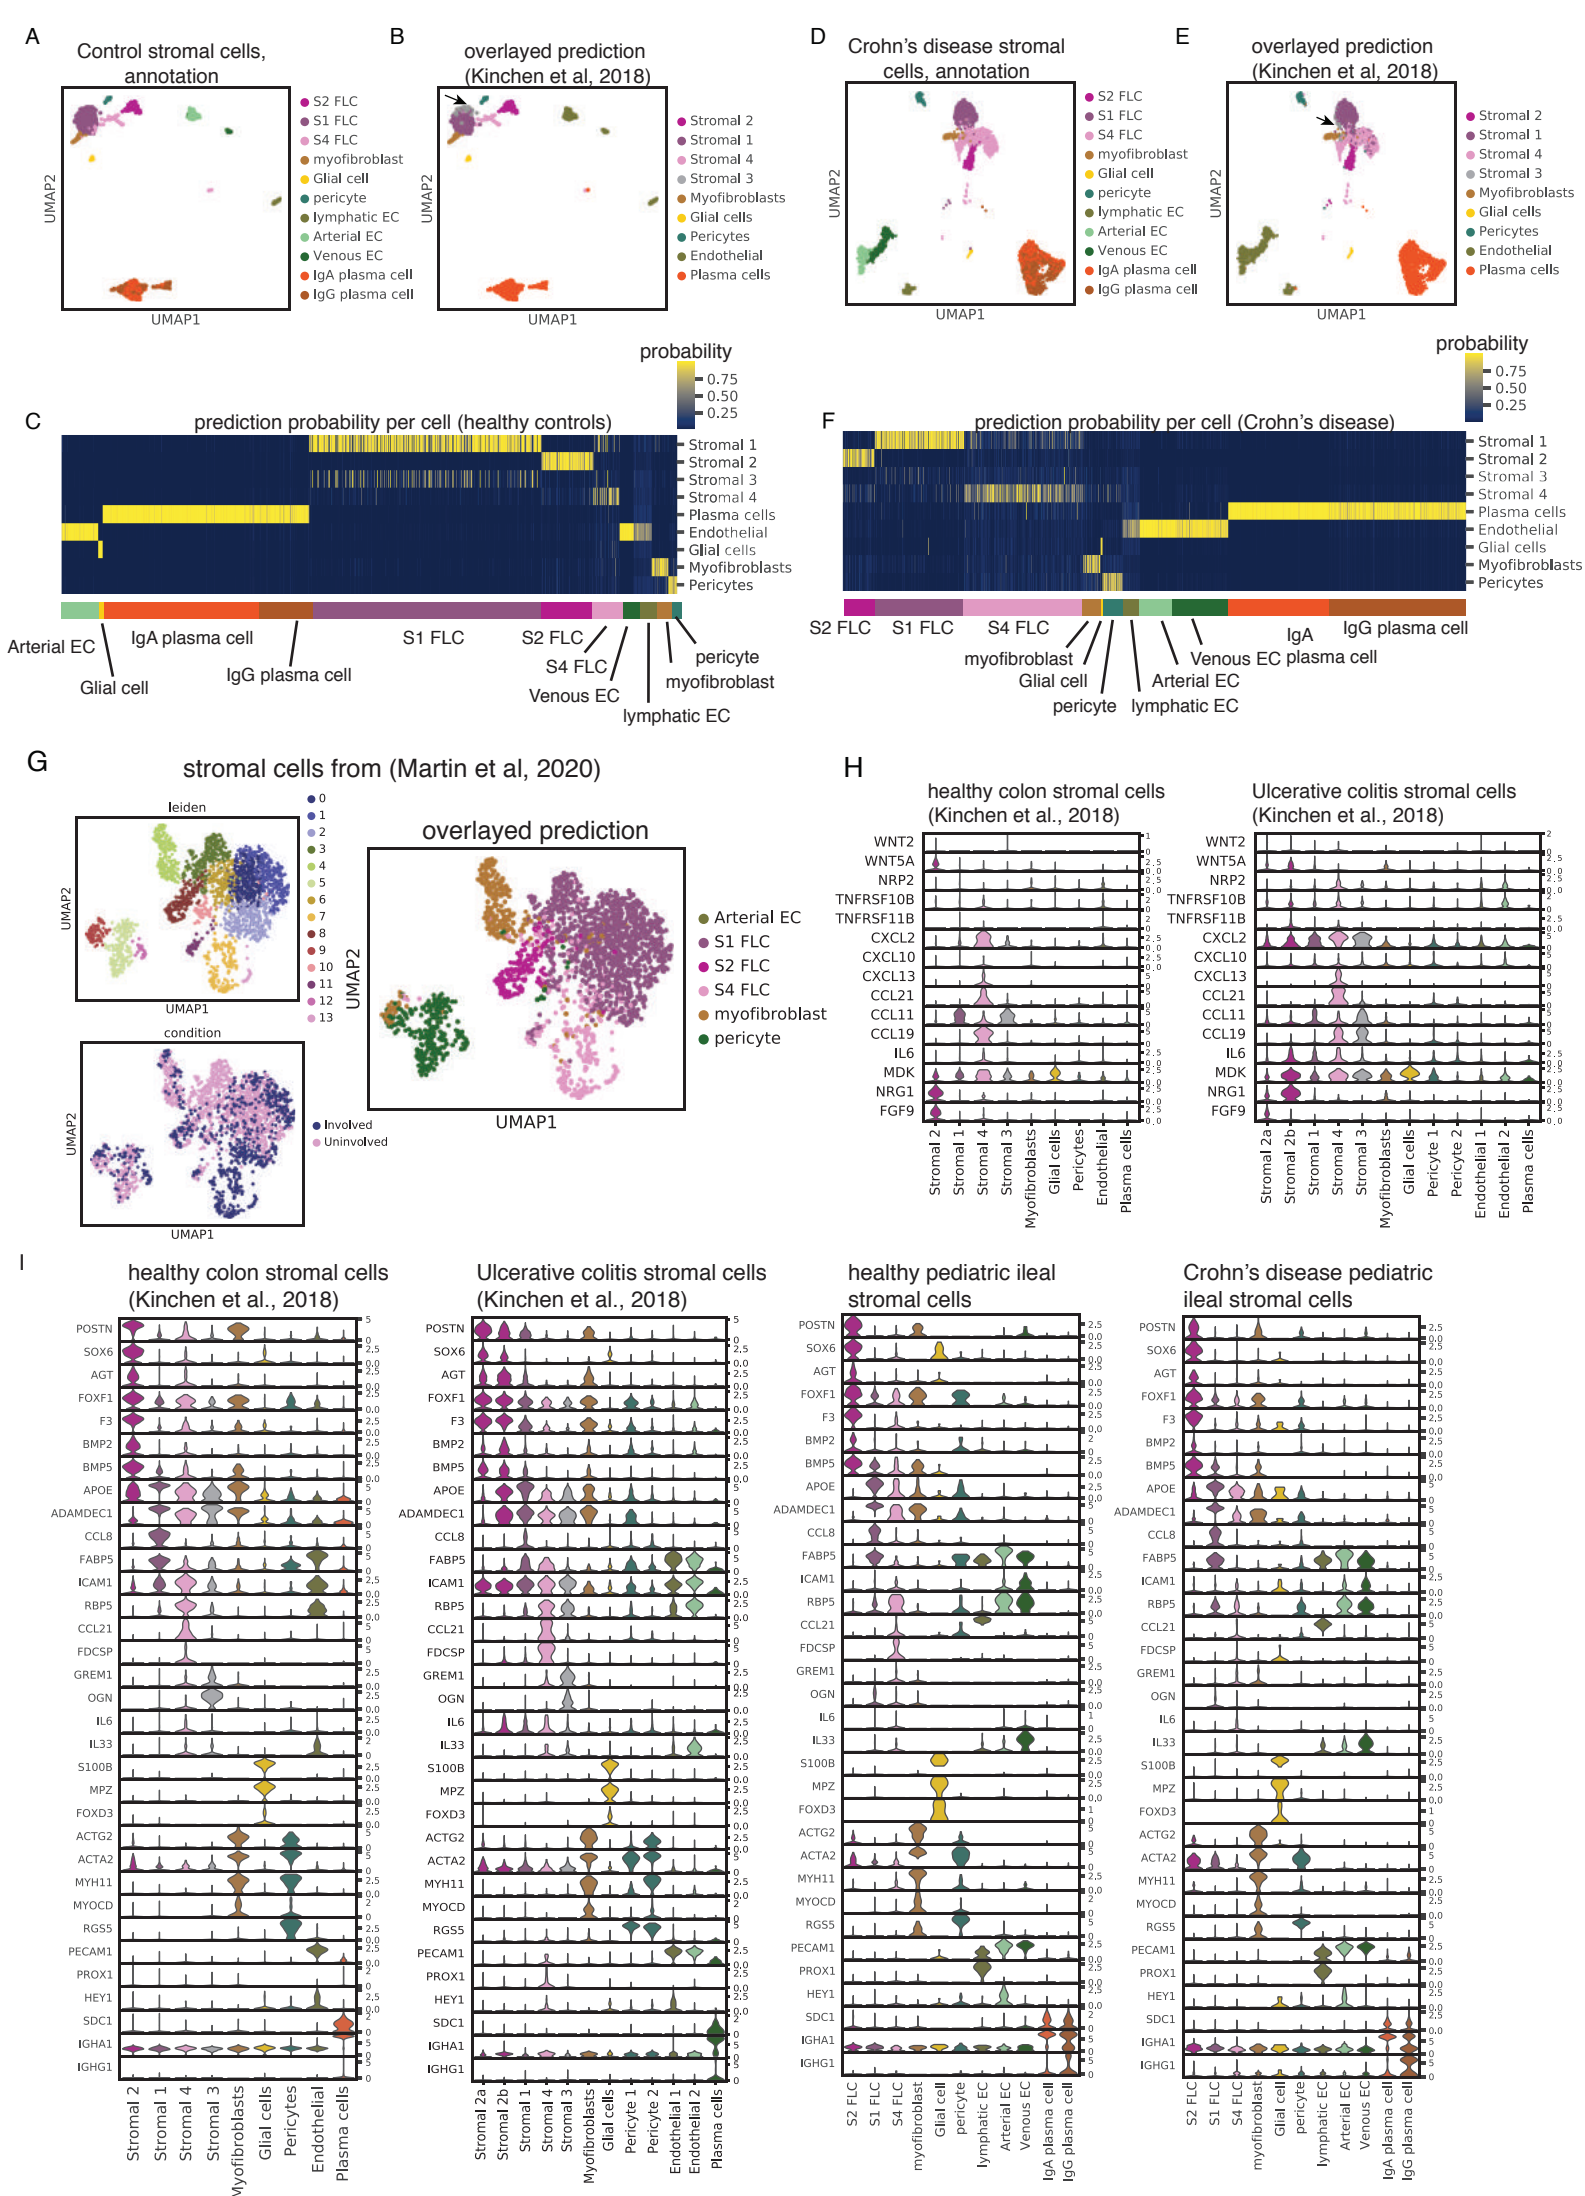



**Figure S1. Related to Figures 1 and 2. Quality control of the three datasets.** A) and B) Bar plots with a number of droplets after QC and Scrublet doublet exclusion grouped by cell type group. Scatter plots show the number of genes over the number of counts per cell, where each dot is a cell. Sample contribution to each cluster in C) Control and D) CD datasets. UMAP plots colored by sample age group in E) Control and F) CD samples. G) Bar plots with number of cells in fetal dataset and UMAP with sample contribution to each cluster. H) Number of fetal cells captured in each timepoint colored by enrichment strategy (top) and region (bottom). I) Number of cells of broad epithelial cell clusters (Uniform progenitor, Small Intestine Epi, Colonic Epi, Secretory Epi) in each of three developing anatomical regions (duo-jejunum, ileum and colon). Epi = epithelium. For fetal samples, the average cell recovery was 1,800 with a total of 62,849 cells at a mean depth of 13, 570 reads per cell and 3,027 mean genes per cell. For paediatric samples, the average recovery was 1,400 cells with 8,093 reads per cell and 1,859 mean genes per cell. CD = Crohn's disease. Fetal sample ages in post-conception weeks were as follows: BRC2029 - 6.1, BRC2026 - 8.4, BRC2043 - 10.2, BRC2046 - 6.7, BRC2049 - 6.9, BRC2121 - 9.2, BRC2119 - 7.9, BRC2133 - 9.9, BRC2134 - 10. Patient ages were as follows: Control group (T036- 4 years, T110- 4 years, T161- 4 years, T057- 6 years, T182- 9 years, T44- 10 years, T024- 12 years, T160- 10 years);

**Figure S2. Related to Figure 3. Marker genes and trajectory analysis of embryonic and fetal intestinal epithelium.** A) UMAP projection of cells after cell-cycle gene exclusion from gene list and dimensionality reduction. The cells are coloured by their cell type annotation. B) Gene expression of adult-like LGR5 stem cell genes. C) Feature plots with selected differentially expressed genes in uniform progenitors. prog = progenitors. PAGA graphs (D and E) and velocity-driven paga graphs (F and I) for embryonic and fetal epithelial cells, respectively. prog = progenitor. PAGA graphs can illustrate either connectivities (solid/dashed lines) or transitions (arrows), where the latter are defined by scVelo. G) and J) Differentiating cell type marker gene expression along the pseudotime (latent time). Cells are colored by the cell type as in UMAP. *PCNA*, *CDK1*- S and G2M phase cells; *BEX5*- uniform progenitors; *LGR5*, *ASCL2*- LGR5 stem cells; *SI*, *ANPEP* - enterocytes; *CHGA*- enteroendocrine cells; *NTS*- NTS+ cells; *BEST4*- BEST4 enterocytes; *CLACA1*, *FCGBP*- goblet cells. H) and K) Top 50 driver genes that display pronounced dynamic behaviour along the pseudotime in embryonic and fetal epithelium, respectively. Top bars in H) and K) represent cell annotation and their colors match annotation colors in F) and I), respectively. prog= progenitor.

**Figure S3. Related to Figure 4. Cell-cell interactions in embryonic and fetal gut.** A) Feature plots with selected genes expressed in three stromal populations in embryonic and fetal gut. Circled populations are serosal cells (yellow), FOXL1 fibroblasts (purple), smooth muscle cells (brown). Arrow points to uniform progenitors. B) smFISH images of serosa mesothelial cells and FOXL1 fibroblasts. i and ii in B) are two biological replicates imaging location of FOXL1 fibroblasts using DAPI, *FOXL1*, and *F3* (stained only in ii), while iii and iv are two biological replicates for locating Serosa mesothelial cells using co-expression of DAPI, *UPK3B*, and *WNT2B*. Scale bar main panel = 100  $\mu$ m, zoom panel = 50  $\mu$ m. C) smFISH images of cycling cells (*MKI67*), epithelial cells (*SHH* and *BEX5*), and *PLA2G2A* gene that is expressed in multiple populations in the gut. White arrows point to *PLA2G2A*-expressing SMCs, red arrow points to *PLA2G2A*-expressing UPK3B Serosa cells. Scale bar main panel = 100  $\mu$ m, zoom panel = 50  $\mu$ m. D) UMAP with overlaid predictions of fetal cells. Predictions were made using logistic regression models trained on adult stromal cells from (Kinchen *et al.*, 2018). E) Heatmap with mean prediction probability in stromal cell clusters. Heatmaps with number of interactions in embryonic (F) and fetal (G) samples as quantified using CellphoneDB v2.0. Color legend indicates the cell type lineage (epithelial-blue, mesenchymal-pink, endothelial-green, neuronal-orange, immune/erythroblast-red) of each plotted cell type. Arrows point to cell-types discussed in text. FLC = fibroblasts, EC = endothelial cells, ICC = interstitial cells of Cajal, S= stromal, SMC = smooth muscle cells.

**Figure S4. Related to Figure 5. Marker gene expression in fetal intestinal organoids and fetal intestinal organoid co-culture with recombinant WNT2B.** A) Heatmap of top 30 differentially expressed genes (DEGs) between mesenchymal and epithelial cells captured in the intestinal organoid culture. The arrows point to key genes associated with either mesenchymal (pink) or epithelial (blue) identity. B) Feature plot with mesenchymal and epithelial marker gene expression in WNT3A- and WNT3A+ organoids. C) Feature plot of epithelial marker genes expressed in p1 and p17 organoid cells. *MKI67*- cycling cells; *LGR5*, *SMOC2*, *RGMB*- *LGR5* stem cells; *SHH*, *BEX5*- uniform progenitors; *BEST4*, *CA7*, *OTOP2*- *BEST4* enterocytes; *ZG16*, *TFF3*- goblet cells; *SI*, *ANPEP*, *PHGR1* - enterocytes; *PDGFRA*, *BMP3*, *BMP4*, *BMP5*, *WNT5A*, *F3*, *FOXL1*- *FOXL1* fibroblasts; D) Schematic with experimental strategy for organoid culture comparison between WNT2B (recombinant protein) and WNT3A (cell-line derived). The organoids were generated from dissociated cells of embryonic proximal ileum, cultured in three different culture conditions and sequenced on the day 5 of passage 1. E) UMAP visualisation of integrated organoid cells from three conditions (WNT3A- or no WNT, WNT2B+, WNT3A+). The UMAPs are colored by cluster identity (left), culture condition (middle), or cell cycle phase score (right). F) Top 30 differentially expressed genes in the epithelial organoid cells between three culture conditions. G) abundance of cells as predicted with logistic regression with more than 80% probability of matching transcriptionally. H) Relative expression of key canonical WNT pathway genes in the epithelium of three culture conditions. PCW = post-conception weeks.

**Figure S5. Related to Figure 6. Crohn's disease patient dataset.** A) UMAP projection of CD samples colored by cell type annotation. B) Dot plot with relative expression and percentage of cells expressing marker genes in paediatric CD dataset. C) and D) Bar plots with percentage of cells in CD dataset as compared with healthy paediatric (Control) dataset, grouped by the broad cell group (stromal = epithelial, mesenchymal, endothelial and glial, and immune = myeloid, T cells and B cells). E) Dot plots with relative expression and percentage of cells expressing marker genes in paediatric healthy (left) and CD (right) epithelium. F) Barplots show abundance of epithelial cell subsets in healthy controls (top, n=8) and children with CD (bottom, n=7). Arrows point to samples that were grouped as "inflamed Crohn's disease". CD = Crohn's disease.

**Figure S6. Related to Figure 6. Pediatric data comparisons with published single-cell datasets.** UMAP projections of stromal cells from healthy pediatric dataset colored by A) original cell type annotation defined in this study and B) overlaid predicted annotation generated by using a logistic regression model trained on scRNAseq data from Kinchen et al. 2018. arrows point to cells predicted to be Stromal 3 cell type. The prediction probabilities for each cell are shown in heatmap C). X-axis shows predicted cell type labels as in Kinchen et al. (2018) and y-axis is grouped by the original annotation as in A). The same logistic regression analysis was done for CD samples and results are shown in UMAPs with C) original annotation, D) overlaid predicted annotations (arrows point to cells predicted to be Stromal 3 cell type), and probability heatmap F). G) The comparison of ileal stromal cells from (Martin et al., 2019) UMAP plots show ileal stromal cells from (Martin et al., 2019).
